# Supplementary material
Source: Research Square preprint supplement (doi:10.21203/rs.3.rs-9622928/v1)
Supplement: Supplementary file 1 [file 985177ba63ccf0a9782a388c.xlsx]

## Sheet: Sheet1
prompt given to chatgpt ->	The following twenty words are the top weighted words in a semantic dimension (presented in order): <top 20 from dim n> Please Give me three high-level labels capturing the meaning represented by the semantic dimension. Each label should be three words or less. After listing all three labels, give a short rationale for why you chose those three labels. Please answer as quickly as possible.
three labels	chatgpt - rationale		top words:	1	2	3	4	5	6	7	8	9	10	11	12	13	14	15	16	17	18	19	20	time for model to reply
Prosocial warmth; Trust and integrity; Moral uplift	The list emphasizes caring connection (kindness, love, affection, friendship, mercy, unity, peace), reliable character and honesty (trust, honesty, genuine, integrity, confidence), and value-laden elevation/spiritual meaning (hope, faith, moral, wisdom, spirit, beauty, admiration).			kindness	love	hope	affection	friendship	mercy	faith	trust	honesty	moral	wisdom	peace	genuine	unity	admiration	confidence	beauty	spirit	personality	integrity	2m 13s
Reasoning and inference; Belief versus evidence; Truth and understanding	The list revolves around making and evaluating claims (theory, logic, prediction, conclusion, explanation, proof, fallacy, assumption). It contrasts epistemic sources (faith, belief, opinion, perception vs fact, proof). Terms like truth, comprehension, insight, reason tie the dimension to understanding and what counts as justified knowledge (with metaphor reflecting explanatory framing).			theory	logic	guess	prediction	proof	faith	fallacy	assumption	fact	opinion	explanation	belief	idea	insight	truth	reason	perception	comprehension	conclusion	metaphor	1m 25s
Competence and ability; Ambition and achievement; Opportunity and risk	The core cluster is capability (talent, skill, ability, mastery, intelligence, quality, performance). Another set emphasizes striving and outcomes (ambition, effort, improvement, accomplishment, job, degree, responsibility). The remaining terms frame the stakes and constraints around action (advantage, opportunity, risk, safety, impossibility).			talent	skill	advantage	ability	ambition	mastery	quality	improvement	opportunity	risk	effort	job	performance	accomplishment	math	intelligence	impossibility	responsibility	degree	safety	1m 17s
Mythic imagination; Fate and destiny; Reality versus escape	Many terms evoke supernatural or story-world elements (fantasy, mystery, magic, myth, miracle, underworld, immortality, darkness, soul). A strong thread concerns predetermination (destiny, fate, future, wish). Words like reality/real paired with escape and imagination/vision suggest tension between the real world and imaginative or escapist alternatives.			fantasy	mystery	magic	destiny	vision	imagination	myth	reality	wish	darkness	soul	mind	future	underworld	immortality	fate	philosophy	real	miracle	escape	1m 10s
Events and incidents; Cause and outcome; Chance and fate	The list is anchored in occurrences (incident, accident, event, instance, occasion, moment, situation), links between what happens and what follows (cause, effect, result, outcome), and the role of unpredictability or destiny (chance, coincidence, circumstance, fate, miracle), with disaster/tragedy/dilemma emphasizing high-stakes events.			incident	disaster	cause	accident	outcome	tragedy	situation	coincidence	circumstance	fate	chance	phenomenon	result	instance	occasion	moment	effect	event	miracle	dilemma	1m 34s
Quantity and magnitude; Measurement dimensions; Increase and reduction	Many words describe how much/how big (volume, capacity, size, amount, abundance, majority, magnitude, proportion, supply). Others are explicit measurable dimensions (length, distance, duration, tallness, brevity/shortness). Terms like increase, reduction, limitation point to changes and constraints in those quantities.			volume	increase	shortness	duration	capacity	size	distance	length	measure	magnitude	proportion	abundance	amount	majority	reduction	tallness	supply	limitation	consistency	brevity	1m 21s
Moral-legal norms; Truth and justification; Reality vs fantasy	The list heavily emphasizes normative standards and social rules (tradition, principle, moral, justice, law, rule, value, revenge), alongside epistemic legitimacy—what counts as true or defensible (fact, truth, honesty, genuine, definition, justification, belief, real). The presence of reality and fantasy suggests an explicit axis contrasting grounded truth with imagined or unreal (with ball look…			tradition	principle	fact	honesty	belief	rule	truth	justification	moral	genuine	justice	real	law	ball	definition	originality	revenge	value	reality	fantasy	1m 54s
Political ideals; Social inclusion; Unity versus division	Core terms are civic values and governance concepts (independence, democracy, freedom, equality, legality, nation, empire). Several words relate to social identity and participation (gender, youth, marriage, engagement, faith, tradition). The mix of unity/diversity alongside exclusion/division/opposition/separation suggests a dimension about how societies organize inclusion and cohesion versus co…			independence	democracy	equality	unity	freedom	gender	tradition	exclusion	diversity	division	opposition	legality	faith	marriage	youth	engagement	nation	separation	idea	empire	2m 19s
Desires and hopes; Speculation and belief; Advice and choice	The list includes wanting-oriented terms (wish, want, hope, worry) and imaginative leaning (fantasy). It also centers on uncertain judgments (guess, bet, assumption, belief, prediction, idea, thought). Finally, it includes decision-support and selection cues (advice, suggestion, consideration, poll, menu, response), with alley seeming like a minor outlier.			wish	want	idea	guess	hope	bet	thought	advice	assumption	attempt	poll	belief	prediction	suggestion	menu	worry	response	fantasy	alley	consideration	1m 48s
Mind and cognition; Wisdom and insight; Moral principles	The list is dominated by mental faculties and contents (mind, thought, memory, idea, belief, instinct, personality, logic, intelligence). It also highlights higher-order understanding (wisdom, insight). Words like conscience, moral, principle, value, tradition add a strong normative/ethical layer (with twig and chief looking like minor outliers).			conscience	intelligence	idea	memory	thought	wisdom	insight	moral	logic	belief	twig	mind	personality	reality	instinct	principle	chief	tradition	value	skill	2m 17s
Negative emotional distress; Powerlessness and limits; Uncertainty and fate	The list is heavy on suffering states (helplessness, anxiety, sadness, misery, grief, despair, frustration, disappointment, boredom). Several terms express constrained agency (limitation, impossibility, availability, empty, want). Words like uncertainty and fate frame the distress as driven by unpredictability and lack of control, with relief/escape/satisfaction appearing as contrasts or desired …			helplessness	worry	empty	anxiety	sadness	uncertainty	misery	want	disappointment	boredom	frustration	fate	satisfaction	availability	limitation	relief	impossibility	grief	escape	despair	0m 39s
Separation and reduction; Exclusion and exception; Disruption and obstruction	The list clusters around breaking apart or decreasing (reduction, separation, subtraction, division, deduction, difference), carving out what doesn’t belong (exclusion, exception, clearance, independence, opposition), and things that interfere with smooth operation (interruption, obstruction, complication, error, impairment, regulation, uncertainty, with circuit fitting the “blocked/altered flow”…			reduction	separation	subtraction	exclusion	exception	uncertainty	interruption	regulation	obstruction	deduction	division	complication	replacement	error	impairment	difference	clearance	independence	circuit	opposition	3m 16s
Variability and diversity; Chance and uncertainty; Possibility and constraint	The strongest cluster is about variation (variety, diversity, difference, originality, exception). A second cluster emphasizes contingency and the unknown (chance, uncertainty, mystery). A third group frames what can happen versus what’s limited (possibility, availability, attempt, advantage contrasted with necessity, impossibility). (fisherman, sow, island look like minor context-specific outlie…			variety	chance	possibility	availability	diversity	exception	fisherman	uncertainty	sow	impossibility	fantasy	necessity	difference	island	instance	occasion	attempt	originality	advantage	mystery	1m 46s
Everyday household items; Clothing and textiles; Cleaning and laundry	Many terms are common domestic objects (item, tool, cup, bag, car, bed), with a strong cluster of apparel/material words (hat, outfit, suit, shirt, sandal, towel, cloth, fabric). The presence of clean, laundry, pile, waste ties the set to routine cleaning/laundry contexts and handling household stuff.			clean	towel	hat	item	laundry	fabric	tool	outfit	pile	size	suit	shirt	cloth	pool	waste	bed	cup	bag	sandal	car	1m 12s
Animals and wildlife; Zoo and farm; Species diversity	Nearly every term is an animal name (wolf, cat, frog, bird/duck/pigeon, gorilla, cow/pig/horse/lamb/hog, lion, alligator/crocodile, spider, lobster), with zoo anchoring an animal-setting context and several clear farm animals mixed in. The variety spans mammals, birds, reptiles, amphibians, and invertebrates, pointing to a broad “animal kinds” dimension.			zoo	wolf	pest	cat	frog	bird	duck	gorilla	cow	pig	animal	spider	lobster	pigeon	horse	lion	lamb	alligator	hog	crocodile	1m 35s
Food and drink; Flavors and ingredients; Meals and treats	The list is dominated by edible items and beverages (chocolate, corn, potato, banana, onion, cucumber, coffee, cocktail, beverage), taste/ingredient terms (butter, sugar, flavor, raspberry), and eating contexts spanning meals and desserts (lunch, entree, salad, cake, candy, diet).			chocolate	butter	flavor	corn	raspberry	cake	salad	potato	lunch	diet	beverage	banana	onion	coffee	cup	entree	candy	cocktail	cucumber	sugar	1m 17s
Seasons and weather; Sky and light; Water and tides	The words cluster into seasonal/climate terms (summer, autumn, winter, season, weather, temperature, month, hurricane, snow, fog), atmospheric/sky phenomena (rainbow, sky, darkness, midnight, moonlight, lightning), and aquatic features and motion (river, wave, ocean, tide).			summer	weather	autumn	season	winter	midnight	rainbow	sky	darkness	month	temperature	hurricane	moonlight	lightning	river	snow	fog	wave	ocean	tide	1m 27s
Combat and weapons; Imperial conflict; Adventure fantasy	Many terms are weapons or attacks (sword, dagger, blade, arrow, missile, bolt), paired with direct fighting (fight, brawl, enemy, bandit). Empire, territory, dynasty, betrayal suggest power struggles and conquest. Beast, eagle, adventurer, mastery, hope add a heroic/adventure tone typical of fantasy or epic narratives.			sword	empire	dagger	territory	betrayal	blade	beast	enemy	bolt	eagle	missile	beetle	fight	brawl	dynasty	adventurer	mastery	arrow	hope	bandit	1m 55s
Deliberate choice-making; Rules and authorization; Planned goal pursuit	The list mixes decision/evaluation terms (decision, selection, preference, consideration, suggestion, information), constraint/permission terms (requirement, regulation, permission), and execution-to-outcome terms (preparation, intention, determination, effort, assistance, accomplishment, result, development), pointing to choosing and acting within rules to achieve results.			preparation	requirement	decision	determination	accomplishment	permission	selection	assistance	preference	interaction	information	regulation	intention	suggestion	effort	promotion	consideration	result	introduction	development	1m 47s
Intense negative affect, Interpersonal harm; Moral transgression	The words center on strongly negative emotions (malice, hatred, anger, disgust, fear, sadness), actions or contexts of hurting others (deceit, betrayal, assault, atrocity, danger), and judgment-laden wrongdoing with self-evaluative fallout (cowardice, shame, regret).			malice	hatred	deceit	disgust	misery	atrocity	anger	hurt	frustration	betrayal	worry	sadness	danger	annoyance	regret	tragedy	assault	fear	cowardice	shame	1m 26s
Governance and statehood; Authority hierarchies; Institutional membership	Many terms name political structures and legal order (nation, law, democracy, republic, state, empire). Others emphasize power organization and leadership (leadership, rule, hierarchy, chief, deputy, dynasty). The remainder points to organized bodies and roles within them (corporation, ownership, duty, job, member, majority, city), suggesting institutions defined by governance, authority, and mem…			corporation	nation	law	democracy	leadership	republic	dynasty	rule	hierarchy	empire	state	majority	diversity	ownership	duty	deputy	city	chief	job	member	1m 42s
Language and literacy; Classroom learning; Creative expression	The strongest cluster is linguistic skills and components (vocabulary, grammar, spelling, alphabet, idiom, definition, translation, speech, writing). Words like lesson, topic, knowledge (and even math) situate it in an educational context. Poetry, rhyme, literature, story, riddle, art add a clear creative/expressive dimension tied to reading and writing.			vocabulary	grammar	spelling	poetry	lesson	literature	rhyme	writing	math	paragraph	topic	knowledge	alphabet	translation	idiom	speech	definition	story	riddle	art	1m 10s
Social identity categories; Family relationships; Person roles	Several words mark identity groupings (gender, youth, boy, woman, mankind, identity, name). Another cluster is kinship (father/dad, mother, sister, child). The rest are labels for people by social role or context (teacher, traveler, donor, fisherman, stranger, suspect, owner, character), suggesting a dimension about how individuals are categorized and identified.			gender	youth	boy	father	child	sister	stranger	woman	dad	donor	traveler	name	mother	mankind	character	teacher	fisherman	identity	suspect	owner	1m 18s
Spatial geography; Borders and territory; Routes and access	Many terms directly describe physical space (location, site, landscape, interior, scene, neighborhood, dimension). Another cluster focuses on separation and jurisdiction (boundary, border, territory, property, nation, acre). A third group is about movement and entry through space (route, distance, traveler, lane, bridge, entrance, alley).			location	boundary	site	distance	route	landscape	interior	scene	border	territory	traveler	lane	neighborhood	bridge	entrance	acre	alley	property	nation	dimension	1m 56s
Numerical quantities; Arithmetic operations; Measurement units	The list is dominated by numbers and amounts (number, dozen, three, fifteen, eight, amount, size), basic math procedures (calculation, addition, subtraction, division), and measurement/time concepts (unit, length, measure, inch, square, time, month, second).			number	math	dozen	three	calculation	fifteen	unit	eight	size	second	subtraction	addition	amount	time	length	measure	inch	month	division	square	1m 21s
Scheduled occasions; Time and calendar; Travel and lodging	Many words refer to planned happenings (holiday, event, occasion, ceremony, meeting, lunch, appointment, tradition). Others anchor them in temporal structure (month, time, moment, past, future, calendar, duration, summer). Terms like traveler, hotel, resort, location add a clear trip/venue component tied to where these occasions take place.			holiday	month	event	time	future	traveler	meeting	moment	location	hotel	occasion	ceremony	lunch	past	calendar	duration	resort	summer	appointment	tradition	1m 23s
Criminal justice; Public safety; Law enforcement	The word set centers on legal order and adjudication (law, justice, legality, justification, punishment, evidence, witness), threats and harm (crime, assault, robbery, riot, danger, accident, escape), and the institutions/policies that manage them (security, safety, protection, policeman, curfew, permission).			law	safety	crime	security	justice	legality	policeman	escape	curfew	assault	punishment	protection	witness	danger	evidence	accident	permission	robbery	riot	justification	1m 36s
Money and payments; Debt and credit; Economic incentives	Many terms are direct monetary transactions (payment, rent, money, wage, salary, tax, coupon). Others emphasize borrowing/obligation (loan, debt, claim, amount). Words like stimulus, incentive, donor, supply, value, economy, abundance point to broader economic flows and motivation/benefits tied to financial behavior (with bet as a risk/expectation form of stake).			loan	payment	rent	debt	amount	income	economy	supply	value	money	wage	stimulus	donor	incentive	tax	abundance	salary	coupon	claim	bet	1m 23s
Emotional arousal; Vocal expression; Neurocognitive response	The list mixes strong affective states and release (anger, grief, anxiety, tension, relief, laughter), speech/sound production cues (lip, speech, lisp, expression, silence, squeak, tune), and underlying mental/physiological mechanisms (reflex, nerve, response, mind, attention, memory, distraction). Together it reads like how emotion and cognition show up as immediate reactions and vocal behavior.			reflex	laughter	relief	lip	speech	anger	memory	nerve	lisp	expression	silence	tension	squeak	mind	attention	grief	anxiety	distraction	response	tune	1m 33s
Performing arts; Theatrical storytelling; Music and poetry	Many terms are stage/production oriented (drama, show, opera, play, performance, production, scene, episode). Others emphasize narrative and imaginative content (story, mystery, fantasy, magic). A strong musical/poetic thread runs through (music, composer, drum, poetry, rhyme), tying it to live or crafted artistic performance.			drama	show	music	opera	play	event	scene	poetry	performance	production	composer	talent	fantasy	magic	ceremony	rhyme	episode	story	mystery	drum	1m 51s
Health and medicine; Body and senses; Infection and hygiene	The list clusters around medical care and treatment (medicine, doctor, hospital, drug, pill, sedative), bodily anatomy and sensory-related parts (nose, skin, nerve, brain, eyeball, blood, body, odor, sneeze), and disease prevention/cleanliness (infection, germ, protection, clean), with donor fitting medical contexts like blood/organ donation.			medicine	doctor	infection	germ	donor	nose	skin	protection	nerve	odor	brain	sedative	sneeze	eyeball	drug	body	blood	pill	hospital	clean	1m 21s
Descriptive attributes; Aesthetic evaluation; Identity presentation	The words emphasize describing properties and features (aspect, variety, size, shape, interior, view, description, scent), judging attractiveness or worth (beauty, appeal, quality, value, opinion), and how a person/thing is socially or visually framed (identity, gender, body, outfit, topic, thing). Together this looks like a dimension about how something is characterized and evaluated—especially …			aspect	beauty	variety	size	interior	view	shape	opinion	example	identity	body	gender	topic	value	description	scent	outfit	thing	appeal	quality	1m 12s
Identity verification; Evidence and truth; Investigative information	The list centers on identifying and confirming who/what something is (name, identification, identity, number, photo, description, real, location/site). It also emphasizes substantiation (proof, evidence, truth). Words like murder and suspect pull it toward an investigative or case-report context, supported by announcement, message, information, topic, introduction.			name	identification	site	identity	proof	truth	thing	information	evidence	description	real	location	murder	number	announcement	photo	topic	suspect	introduction	message	1m 23s
Electricity and physics; Industrial equipment; Hazards and safety	Core terms are electrical/physical concepts (electricity, volt, physics, circuit, atom, magnitude, effect), with natural/related phenomena (lightning, shock). Several words point to machinery or applied/industrial contexts (ignition, burner, refrigerator, industry, flask, vapor, steam). Hazard and safety explicitly frame the dimension around risky physical processes and their control.			electricity	ignition	volt	physics	lightning	weather	shock	circuit	burner	hazard	volume	refrigerator	effect	industry	safety	vapor	steam	atom	flask	magnitude	2m 28s
Ceremonial attire; Design and materials; Social symbolism	Many words are clothing/accessories (costume, clothing, jacket, necklace, suit, uniform, fabric, material, jewel) tied to formal events (marriage, ceremony, occasion, arrangement). Design and material terms emphasize construction/aesthetics. Words like significance, unity, reputation (and even protection) point to the symbolic and social meaning attached to what’s worn in such ceremonies.			marriage	costume	clothing	design	ceremony	jacket	necklace	arrangement	jewel	suit	material	uniform	fabric	significance	unity	measure	reputation	protection	interior	occasion	1m 33s
Religious holiday spirit; Faith and miracles; Charity and mercy	Christmas, holiday, bell, psalm, parish anchor a specifically religious/seasonal context. Words like faith, belief, soul, spirit, miracle, magic, myth, fate emphasize spiritual belief and the miraculous. Charity, donor, mercy highlight giving and compassion, with hope/wish and grief reflecting the emotional tone often associated with such themes.			christmas	spirit	psalm	magic	charity	faith	wish	hope	miracle	myth	mercy	holiday	donor	fate	bell	belief	soul	art	parish	grief	1m 21s
